# Supplementary material
Source: Springer Nature journal article supplement (https://www.springermedizin.de/resource/supplementary/13058_2010_2859_MOESM11_ESM.pdf/9702726)

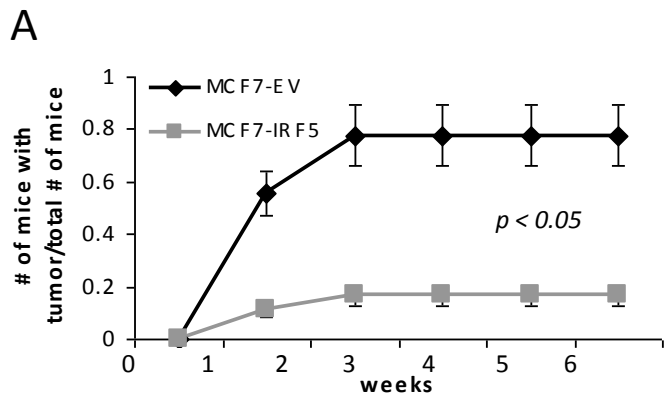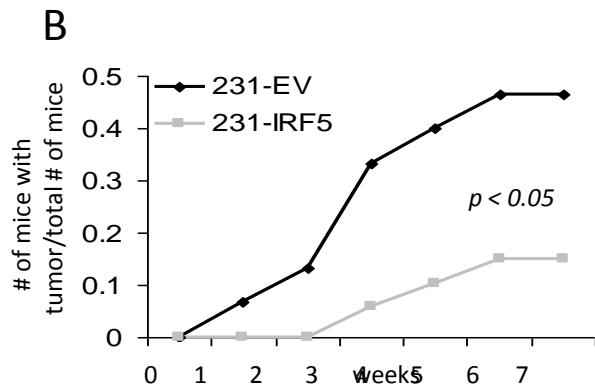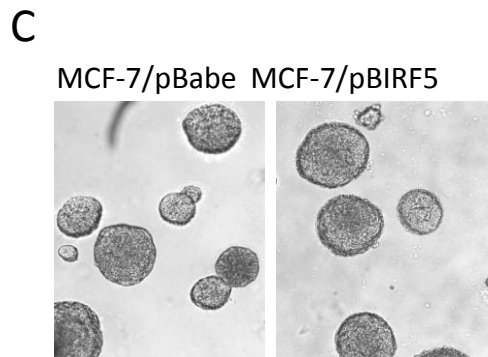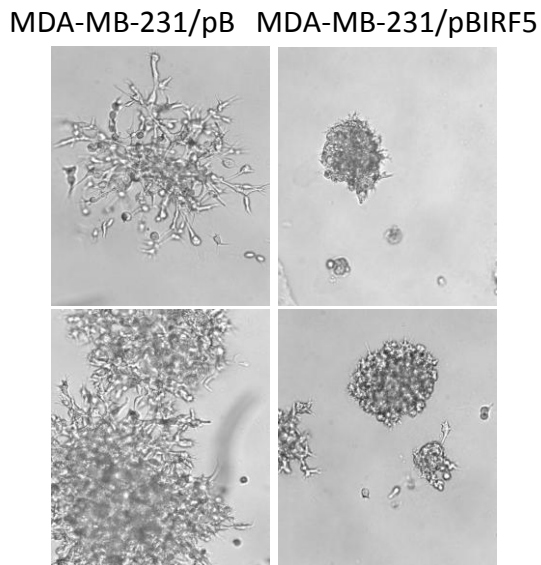

Supplement: MOESM11 [file 9702726]
